# Supplementary material for: Analysis of Multiclass Pesticide Residues in Tobacco by Gas Chromatography Quadrupole Time-of-Flight Mass Spectrometry Combined with Mini Solid-Phase Extraction
Source: MDPI journal article supplement (doi:10.3390/separations9050104), 2022-04-21
Supplement: s1 [file s1]

**S1.** CAS number, retention time of the 209 pesticides

| Pesticides                  | CAS        | RT (min) |
|-----------------------------|------------|----------|
| 1,2-Dibromo-3-chloropropane | 96-12-8    | 4.47     |
| Dichlorvos                  | 62-73-7    | 6.19     |
| Disulfoton sulfoxide        | 2497-07-6  | 7.30     |
| Mevinphos(E)                | 298-01-1   | 9.00     |
| Butylate                    | 2008-41-5  | 9.08     |
| Mevinphos(Z)                | 338-45-4   | 9.17     |
| Pebulate                    | 1114-71-2  | 9.62     |
| Methacrifos                 | 62610-77-9 | 10.46    |
| Molinate                    | 2212-67-1  | 11.07    |
| Isoprocab                   | 2631-40-5  | 11.13    |
| Heptenophos                 | 23560-59-0 | 11.90    |
| Chlorphenprop-methyl        | 14437-17-3 | 12.14    |
| Thionazin                   | 297-97-2   | 12.48    |
| Fenobucarb                  | 3766-81-2  | 12.51    |
| Propoxur                    | 114-26-1   | 12.58    |
| Demeton-O                   | 298-03-3   | 12.61    |
| Demeton-S-methyl            | 919-86-8   | 12.73    |
| Cycloate                    | 1134-23-2  | 13.00    |
| Ethoprophos                 | 13194-48-4 | 13.01    |
| Chlorpropham                | 101-21-3   | 13.34    |
| Naled                       | 300-76-5   | 13.42    |
| Chlordimeform               | 6164-98-3  | 13.47    |
| Trifluralin                 | 1582-09-8  | 13.95    |
| Benfluralin                 | 1861-40-1  | 14.03    |
| Cadusafos                   | 95465-99-9 | 14.08    |
| Phorate                     | 298-02-2   | 14.22    |
| BHC-alpha                   | 608-73-1   | 14.32    |
| Hexachlorobenzene           | 118-74-1   | 14.59    |
| Dicloran                    | 99-30-9    | 14.78    |
| Demeton-S                   | 126-75-0   | 14.85    |
| Dimethoate                  | 60-51-5    | 14.88    |
| Carbofuran                  | 1563-66-2  | 15.21    |
| Atrazine                    | 1912-24-9  | 15.32    |
| BHC-beta                    | 608-73-1   | 15.36    |
| Clomazone                   | 81777-89-1 | 15.39    |
| Propazine                   | 139-40-2   | 15.49    |
| Terbumeton                  | 33693-04-8 | 15.56    |

|                          |            |       |
|--------------------------|------------|-------|
| BHC-gamma                | 608-73-1   | 15.58 |
| Quintozene               | 82-68-8    | 15.67 |
| Terbufos                 | 13071-79-9 | 15.87 |
| Trietazine               | 1912-26-1  | 15.92 |
| Fonofos                  | 944-22-9   | 15.94 |
| Phosphamidon(E)          | 297-99-4   | 16.33 |
| Diazinon                 | 333-41-5   | 16.42 |
| Disulfoton               | 298-04-4   | 16.45 |
| BHC-delta                | 608-73-1   | 16.52 |
| Mexacarbate              | 315-18-4   | 16.77 |
| Triallate                | 2302-17-5  | 16.84 |
| Tefluthrin               | 79538-32-2 | 16.88 |
| Isazofos                 | 42509-80-8 | 16.89 |
| 3-Hydroxycarbofuran      | 16655-82-6 | 16.95 |
| Iprobenfos               | 26087-47-8 | 17.14 |
| Pirimicarb               | 23103-98-2 | 17.38 |
| Benfuresate              | 68505-69-1 | 17.63 |
| Phosphamidon(Z)          | 23783-98-4 | 17.69 |
| Propanil                 | 709-98-8   | 17.73 |
| Dimethachlor             | 50563-36-5 | 17.79 |
| Acetochlor               | 34256-82-1 | 18.06 |
| Parathion-methyl         | 298-00-0   | 18.10 |
| Chlorpyrifos-methyl      | 5598-13-0  | 18.11 |
| Vinclozolin              | 50471-44-8 | 18.12 |
| Simetryn                 | 1014-70-6  | 18.26 |
| Carbaryl                 | 63-25-2    | 18.27 |
| Tolclofos-methyl         | 57018-04-9 | 18.27 |
| Heptachlor               | 76-44-8    | 18.30 |
| Alachlor                 | 15972-60-8 | 18.42 |
| Prometryn                | 7287-19-6  | 18.62 |
| Metalaxyl                | 57837-19-1 | 18.64 |
| Fenchlorphos             | 299-84-3   | 18.66 |
| Prosulfocarb             | 52888-80-9 | 18.78 |
| Demeton-S-methyl sulfone | 17040-19-6 | 18.83 |
| Thiobencarb              | 28249-77-6 | 19.00 |
| Orbencarb                | 34622-58-7 | 19.02 |
| Methiocarb               | 2032-65-7  | 19.16 |
| Fenitrothion             | 122-14-5   | 19.19 |
| Pentanochlor             | 2307-68-8  | 19.26 |
| Pirimiphos-methyl        | 29232-93-7 | 19.31 |

|                              |             |       |
|------------------------------|-------------|-------|
| Bromacil                     | 314-40-9    | 19.31 |
| Ethofumesate                 | 26225-79-6  | 19.33 |
| Aldrin                       | 309-00-2    | 19.59 |
| Malathion                    | 121-75-5    | 19.65 |
| Phorate-sulfone              | 2588-04-7   | 19.77 |
| Metolachlor                  | 51218-45-2  | 19.78 |
| Fenthion                     | 55-38-9     | 19.91 |
| Dicofol                      | 115-32-2    | 19.94 |
| Parathion                    | 56-38-2     | 19.97 |
| Thiazopyr                    | 117718-60-2 | 19.98 |
| Chlorpyrifos                 | 2921-88-2   | 19.99 |
| Triadimefon                  | 43121-43-3  | 20.11 |
| Chlorthal-dimethyl           | 1861-32-1   | 20.15 |
| Flufenacet                   | 142459-58-3 | 20.20 |
| Dimetachlone                 | 24096-53-5  | 20.22 |
| Isocarbophos                 | 24353-61-5  | 20.25 |
| Thiamethoxam                 | 153719-23-4 | 20.53 |
| Bromophos                    | 2104-96-3   | 20.60 |
| Butralin                     | 33629-47-9  | 20.64 |
| Diphenamid                   | 957-51-7    | 20.66 |
| Isopropalin                  | 33820-53-0  | 20.95 |
| Oxychlordane                 | 155681-22-4 | 21.05 |
| trans-Chlorfenvinphos        | 18708-86-6  | 21.07 |
| Heptachlor epoxides (cis-)   | 1024-57-3   | 21.11 |
| Terbufos sulfone             | 56070-16-7  | 21.17 |
| Pendimethalin                | 40487-42-1  | 21.19 |
| Penconazole                  | 66246-88-6  | 21.22 |
| Heptachlor epoxides (trans-) | 28044-83-9  | 21.28 |
| Captan                       | 133-06-2    | 21.43 |
| cis-Chlorfenvinphos          | 18708-87-7  | 21.47 |
| Isofenphos                   | 25311-71-1  | 21.57 |
| Quinalphos                   | 13593-03-8  | 21.62 |
| Triadimenol                  | 55219-65-3  | 21.64 |
| Phenthoate                   | 2597-03-7   | 21.66 |
| Folpet                       | 133-07-3    | 21.67 |
| Methoprene                   | 40596-69-8  | 21.93 |
| Chlordane-trans              | 5103-71-9   | 21.99 |
| Methidathion                 | 950-37-8    | 22.10 |
| o,p'-DDE                     | 3424-82-6   | 22.25 |
| Haloxypop-methyl             | 69806-40-2  | 22.35 |

|                    |             |       |
|--------------------|-------------|-------|
| alpha-Endosulfan   | 959-98-8    | 22.43 |
| Disulfoton-sulfone | 2497-06-5   | 22.53 |
| Tetrachlorvinphos  | 22248-79-9  | 22.53 |
| Chlordane-cis      | 5103-74-2   | 22.56 |
| Mepanipyrin        | 110235-47-7 | 22.60 |
| Butachlor          | 23184-66-9  | 22.70 |
| Flumetralin        | 62924-70-3  | 22.75 |
| Napropamide        | 15299-99-7  | 22.96 |
| Fenamiphos         | 22224-92-6  | 22.98 |
| Butamifos          | 36335-67-8  | 23.00 |
| Hexaconazole       | 79983-71-4  | 23.02 |
| Imazalil           | 35554-44-0  | 23.17 |
| Prothiofos         | 34643-46-4  | 23.19 |
| Isoprothiolane     | 50512-35-1  | 23.25 |
| Profenofos         | 41198-08-7  | 23.31 |
| Dieldrin           | 60-57-1     | 23.39 |
| p,p'-DDE           | 72-55-9     | 23.42 |
| Uniconazole-P      | 83657-17-4  | 23.44 |
| Pretilachlor       | 51218-49-6  | 23.45 |
| Tribufos           | 78-48-8     | 23.45 |
| Oxadiazon          | 19666-30-9  | 23.67 |
| o,p'-DDD           | 53-19-0     | 23.72 |
| Myclobutanil       | 88671-89-0  | 23.73 |
| Flamprop-methyl    | 52756-25-9  | 23.80 |
| Buprofezin         | 69327-76-0  | 23.83 |
| Oxyfluorfen        | 42874-03-3  | 23.89 |
| Bupirimate         | 41483-43-6  | 24.01 |
| Thifluzamide       | 130000-40-7 | 24.05 |
| Kresoxim-methyl    | 143390-89-0 | 24.07 |
| Nitrofen           | 1836-75-5   | 24.16 |
| Endrin             | 72-20-8     | 24.19 |
| Isoxathion         | 18854-01-8  | 24.18 |
| Fluazifop-butyl    | 69806-50-4  | 24.46 |
| beta-Endosulfan    | 33213-65-9  | 24.52 |
| Chlorobenzilate    | 510-15-6    | 24.62 |
| Fensulfothion      | 115-90-2    | 24.78 |
| Fenthion sulfoxide | 3761-41-9   | 24.79 |
| Aclonifen          | 74070-46-5  | 24.94 |
| p,p'-DDD           | 72-54-8     | 24.96 |
| Fenthion sulfone   | 3761-42-0   | 25.01 |

|                     |             |       |
|---------------------|-------------|-------|
| o,p'-DDT            | 789-02-6    | 25.04 |
| Oxadixyl            | 77732-09-3  | 25.11 |
| Ethion              | 563-12-2    | 25.20 |
| Chlorthiophos       | 60238-56-4  | 25.30 |
| Triazophos          | 24017-47-8  | 25.64 |
| Carbophenothion     | 786-19-6    | 25.89 |
| Benalaxyl           | 71626-11-4  | 25.99 |
| Endosulfan sulfate  | 1031-07-8   | 26.08 |
| Carfentrazone-ethyl | 128621-72-7 | 26.10 |
| Propiconazole I     | 60207-90-1  | 26.16 |
| Propiconazole II    | 60207-90-1  | 26.38 |
| p,p'-DDT            | 50-29-3     | 26.26 |
| Hexazinone          | 51235-04-2  | 26.67 |
| Tebuconazole        | 107534-96-3 | 26.75 |
| Thenylchlor         | 96491-05-3  | 26.78 |
| Triphenyl phosphate | 115-86-6    | 27.04 |
| Piperonyl butoxide  | 51-03-6     | 27.21 |
| Pyributicarb        | 88678-67-5  | 27.72 |
| Benzoylprop-ethyl   | 22212-55-1  | 27.74 |
| Iprodione           | 36734-19-7  | 27.80 |
| Bromopropylate      | 18181-80-1  | 28.10 |
| Carbosulfan         | 55285-14-8  | 28.13 |
| EPN                 | 2104-64-5   | 28.14 |
| Picolinafen         | 137641-05-5 | 28.27 |
| Chlorantraniliprole | 500008-45-7 | 28.32 |
| Bifenthrin          | 82657-04-3  | 28.33 |
| Methoxychlor        | 72-43-5     | 28.38 |
| Fenamidone          | 161326-34-7 | 28.63 |
| Anilofos            | 64249-01-0  | 28.83 |
| Clomeprop           | 84496-56-0  | 28.88 |
| Tetradifon          | 116-29-0    | 29.02 |
| Phosalone           | 2310-17-0   | 29.39 |
| Leptophos           | 21609-90-5  | 29.46 |
| Cyhalofop-butyl     | 122008-85-9 | 29.83 |
| Cyhalothrin         | 91465-08-6  | 30.22 |
| Fenarimol           | 60168-88-9  | 30.32 |
| Pyrazophos          | 13457-18-6  | 30.66 |
| Benfuracarb         | 82560-54-1  | 30.79 |
| Fenoxaprop-P-ethyl  | 71283-80-2  | 31.03 |
| Bitertanol          | 55179-31-2  | 31.38 |

|                    |             |       |
|--------------------|-------------|-------|
| Permethrin-cis     | 54774-45-7  | 31.59 |
| Permethrin-trans   | 51877-74-8  | 31.86 |
| Boscalid           | 188425-85-6 | 33.36 |
| Quizalofop-p-ethyl | 100646-51-3 | 33.54 |
| Quizalofop-ethyl   | 76578-14-8  | 33.61 |
| Flucythrinate I    | 70124-77-5  | 33.81 |
| Flucythrinate II   | 70124-77-5  | 34.19 |
| Fenvalerate        | 51630-58-1  | 35.10 |
| Deltamethrin       | 52918-63-5  | 36.51 |
| Indoxacarb         | 144171-61-9 | 36.51 |
| Dimethomorph(Z)    | 110488-70-5 | 37.02 |
| Dimethomorph(E)    | 110488-70-5 | 37.57 |

## S2. Sample preparation of d-SPE

A tobacco sample (2 g) was weighted into a 50 mL centrifuge tube, and 10 mL of water was added to it. The tube was vortexed, following which the solution was allowed to stand for 30 min. After adding 15 mL of an acetonitrile–acetic acid solution ((99/1,v/v)), 6 g of anhydrous magnesium sulfate, 1.5 g of sodium acetate, and a ceramic homogeneous proton, the centrifuge tube was closed, shaken vigorously for 1 min, and centrifuged at 4200 rpm for 5 min. The supernatant (8 mL) was added to a 15 mL plastic centrifuge tube containing 1200 mg magnesium sulfate, 400 mg PSA, 400 mg C18, and 200 mg GCB, following which the tube was vortexed for 1 min. Then, the mixture was centrifuged at 4200 rpm for 5 min, and exactly 2 mL of the supernatant was withdrawn into a 10 mL test tube. The supernatant was blown with nitrogen at 40 °C in a water bath until the supernatant was almost dry. Then, 20 µL of an internal standard solution and 1 mL of ethyl acetate were added for reconstitution. The reconstituted solution was filtered through a 0.22-µm Nylon membrane prior to GC-QTOF/MS.
